# Supplementary material for: Development of a written assessment for a national interprofessional cardiotocography education program
Source: PubMed Central journal article supplement (PMC5437628; doi:10.1186/s12909-017-0915-2), 2017-05-18

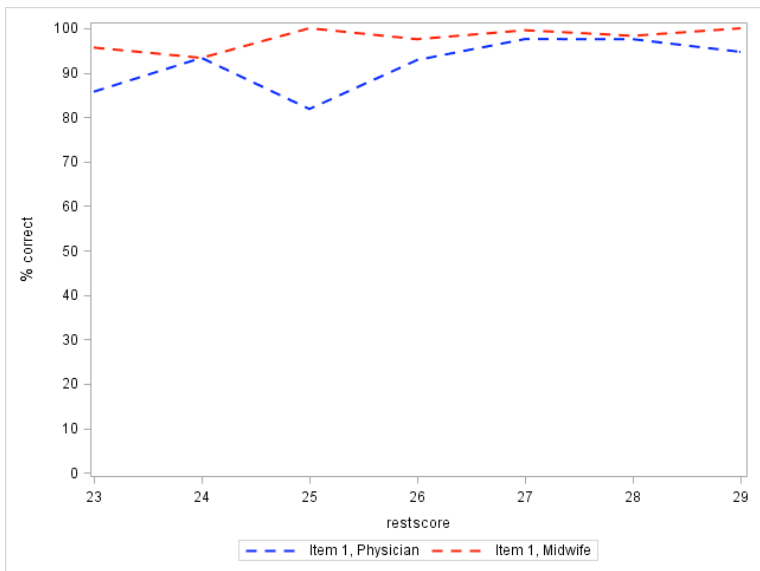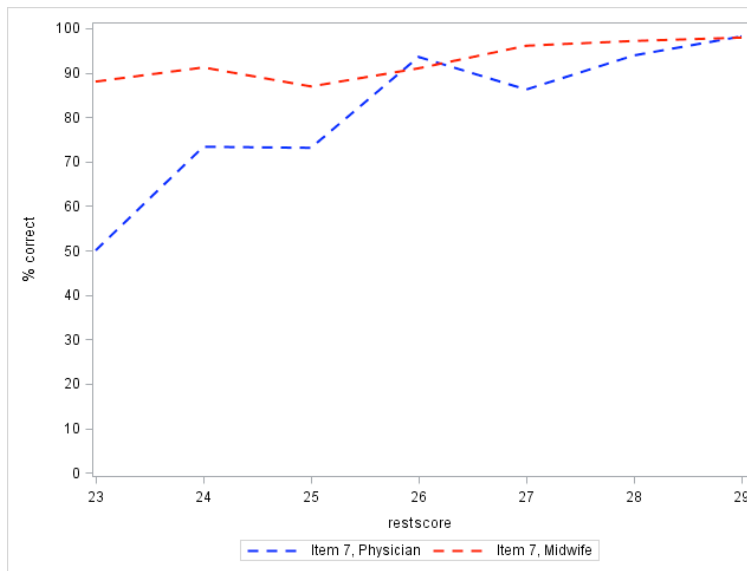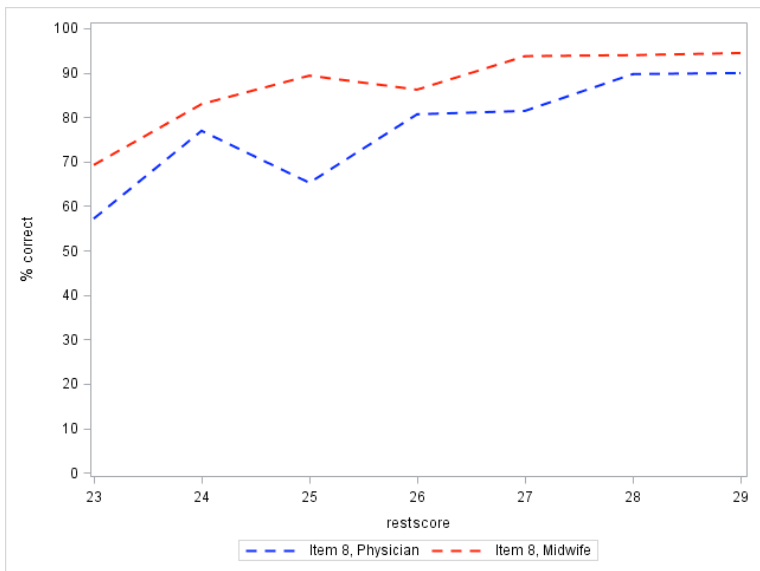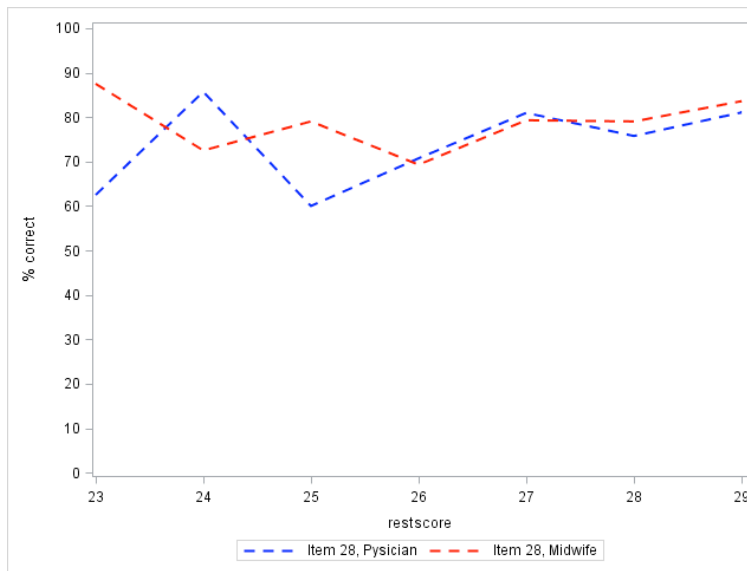

Supplement: 12909_2017_915_MOESM2_ESM.pdf [file 12909_2017_915_MOESM2_ESM.pdf]
